# Supplementary material for: Synergistic Effect of Metformin and Lansoprazole Against Gastric Cancer through Growth Inhibition
Source: PubMed Central journal article supplement (PMC10198141; doi:10.7150/ijms.82407), 2023-04-17
Supplement: ijmsv20p0717s1.pdf [file ijmsv20p0717s1.pdf]

## Supplementary description:

Figure S1. Viability of AGS treated with various drug concentrations. A. The AGS cell line was treated with metformin (M: 0.1–9 mM). B. The AGS cell line was treated with lansoprazole (L: 3–270  $\mu$ M). C. The AGS cell line was treated with combined drugs L+M (L: lansoprazole 10  $\mu$ M; M: metformin 1 mM) for 3 days and then its viability was determined using the WST-1 assay. The data was presented as the mean with SD.

Video S2. Time-lapse video. The AGS cell line was seeded in a 6-well plate (5000 cells/well). The compounds were treated for 3 days. HoloMonitor M4 captured real-time cell images, which were then converted into a video by using the HoloMonitor M4 application program.

The video file can be downloaded from the following URL. <http://tdl.ibms.sinica.edu.tw/download/download.html>

Figure S3. Lansoprazole and metformin exhibited a synergistic effect in AGS. The AGS cell line was treated with metformin (1 mM) and varying concentrations of lansoprazole (3, 10, 30, 90, and 270  $\mu$ M), and the data was then analyzed using SynergyFinder to calculate the combination index (CI).

Figure S4. Phase-contrast photographs of the AGS cell line. The cells were treated with metformin (M; 1 mM), lansoprazole (L; 10  $\mu$ M), or combined drugs L+M (L: lansoprazole 10  $\mu$ M; M: metformin 1 mM) for 3 and 8 days.

Figure S5. DAPI cell cycle. The AGS cell line was treated with drugs for 3 days, stained with DAPI, and the results were analyzed using the flow cytometer and FlowJo (v7). C: control; L: lansoprazole (10  $\mu$ M); M: metformin (1 mM); L+M (L: lansoprazole 10  $\mu$ M; M: metformin 1 mM)

Figure S6. AGS cell line was treated with metformin (M: 1mM), lansoprazole (L: 10  $\mu$ M) and L+M (L: lansoprazole 10  $\mu$ M; M: metformin 1 mM) for 3 days, then using western blot to display the protein level of different drug treatment. Quantification of western-blot bands was done by ImageJ software. The data was presented as the mean with SD.

Figure S7. AGS cell line was treated with metformin (M: 1mM),

lansoprazole (L: 10  $\mu$ M) and L+M (L: lansoprazole 10  $\mu$ M; M: metformin 1 mM) for 3 days, then using western blot to display the protein level of different drug treatment. Quantification of western-blot bands was done by ImageJ software. The data was presented as the mean with SD.

Table S1. Antibodies used in this study

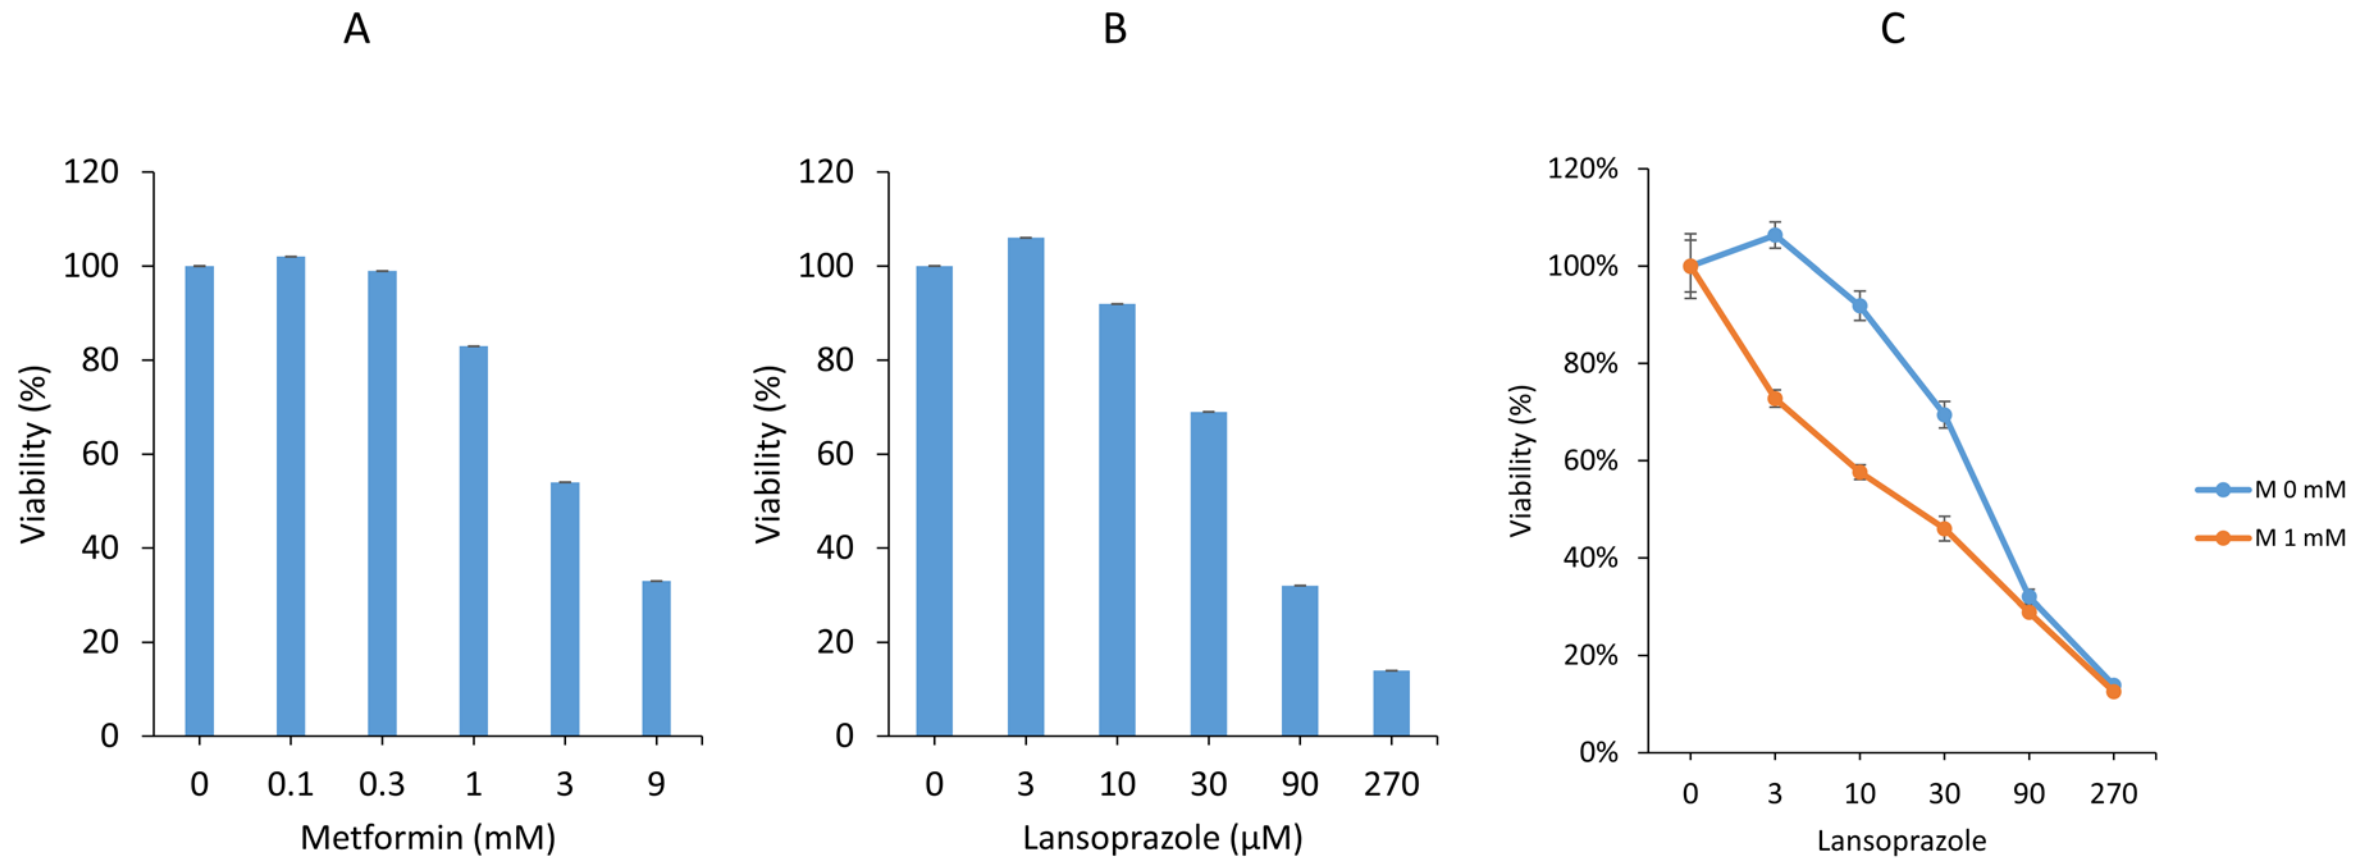

Control

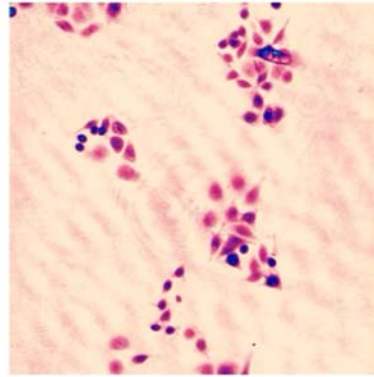

Lansoprazole (10  $\mu$ M)

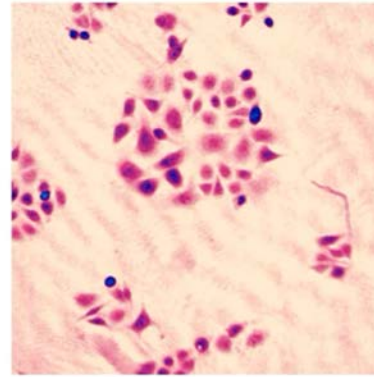

Metformin (1 mM)

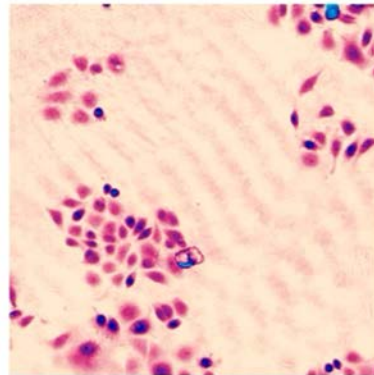

L + M

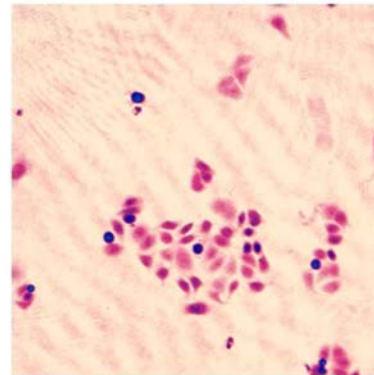

Combination Index Plot

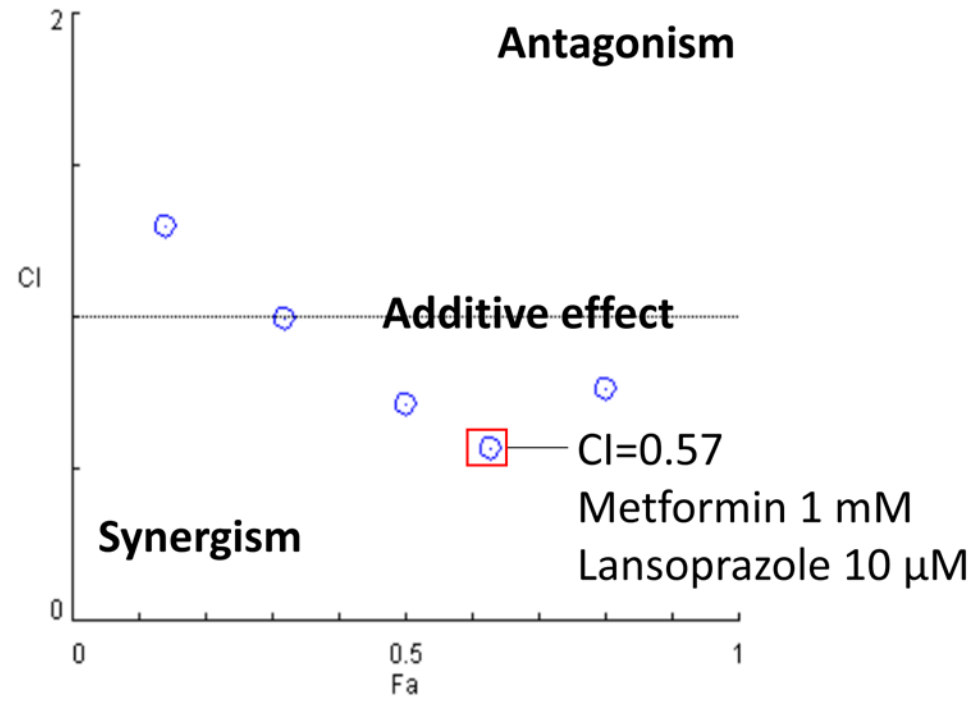

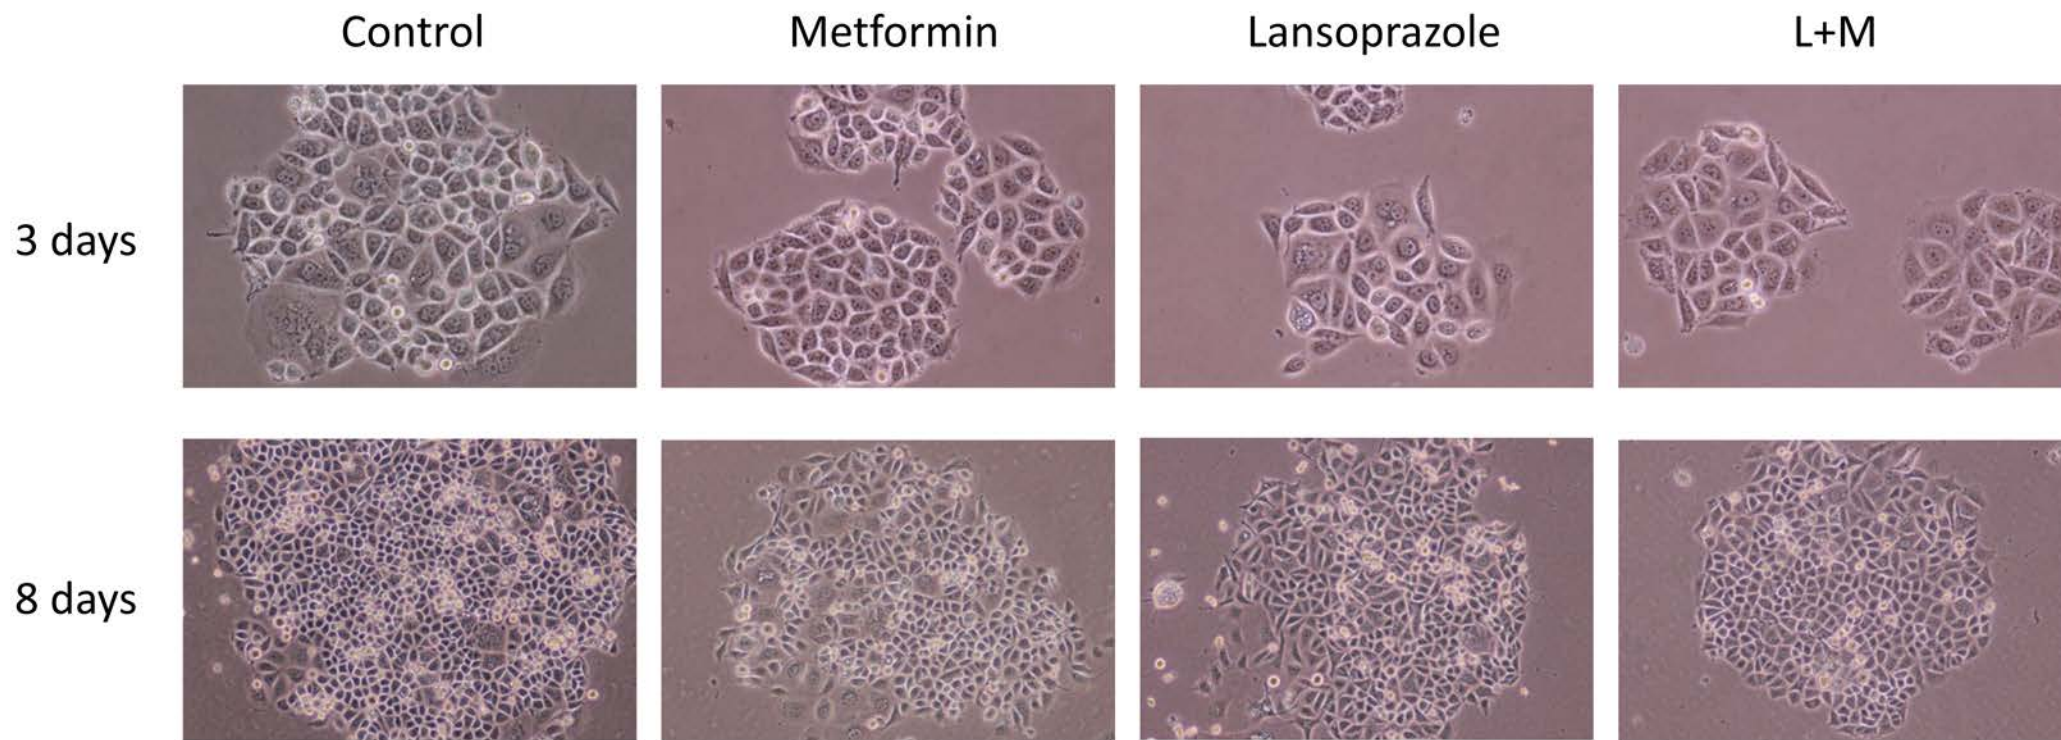

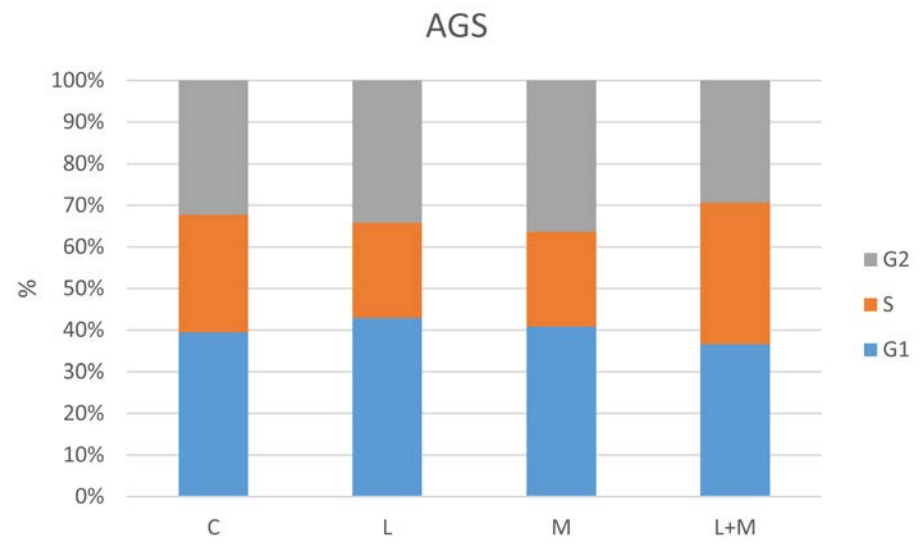

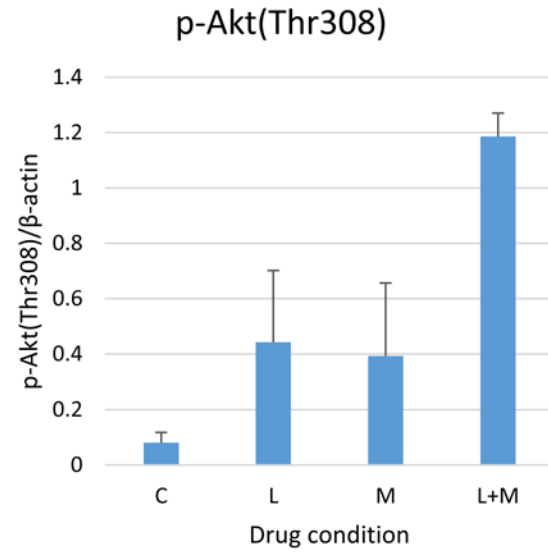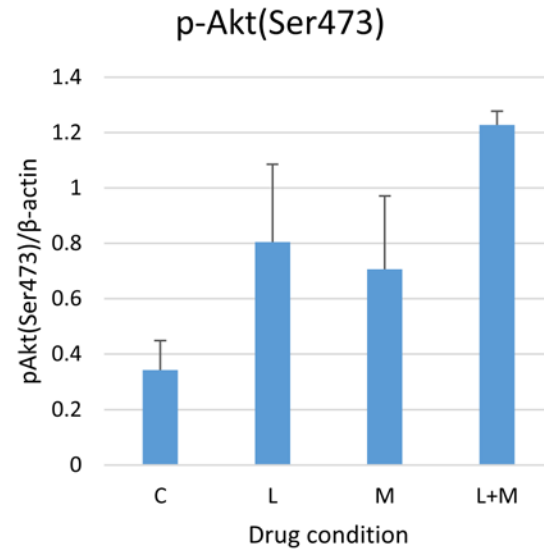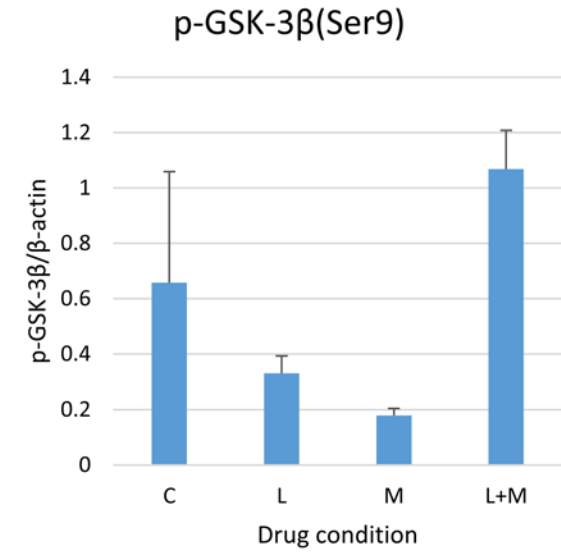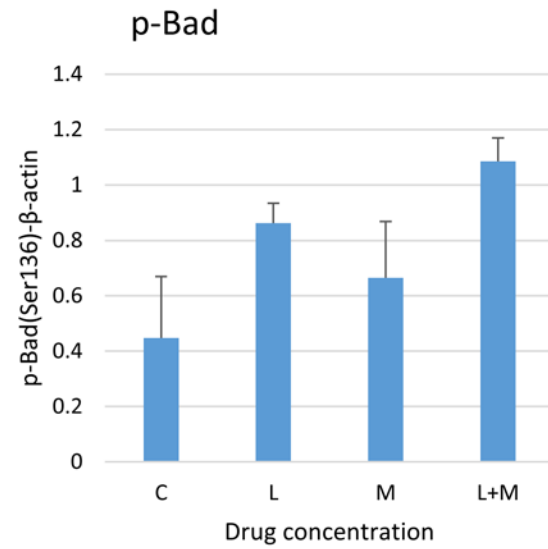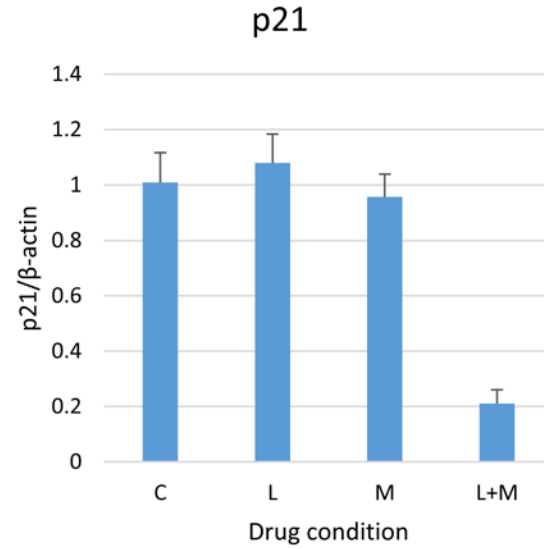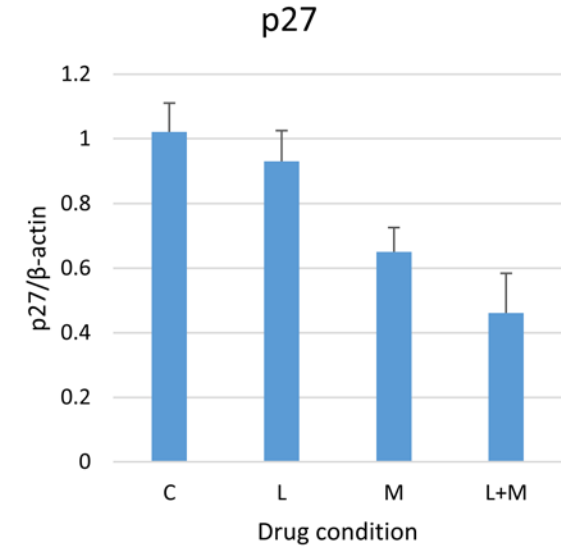



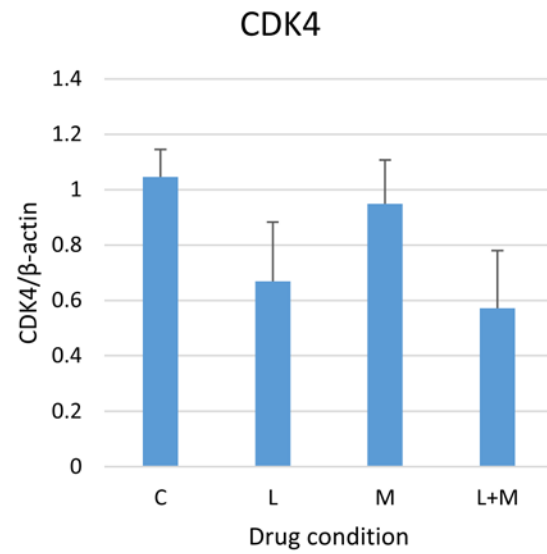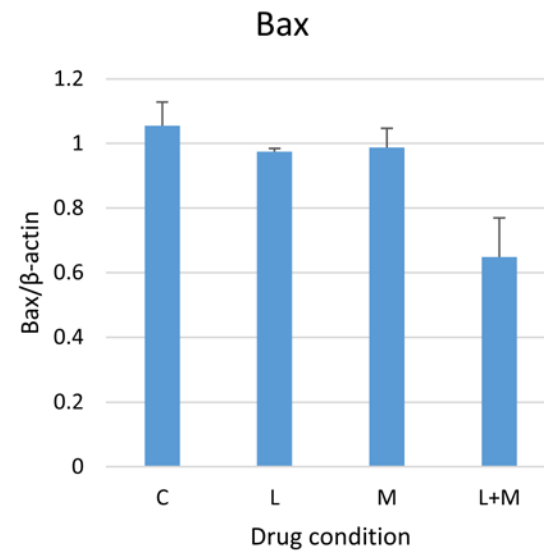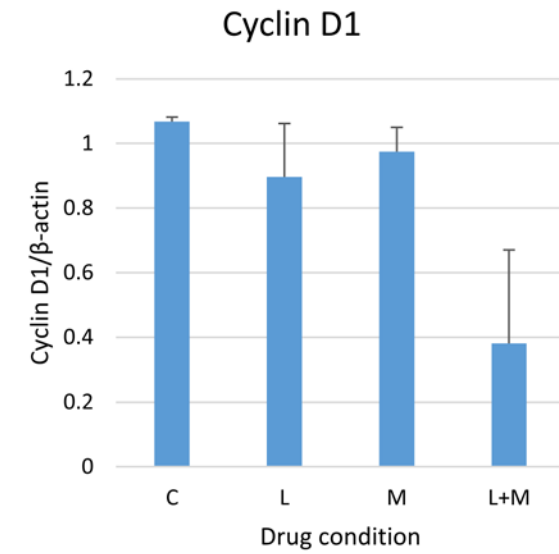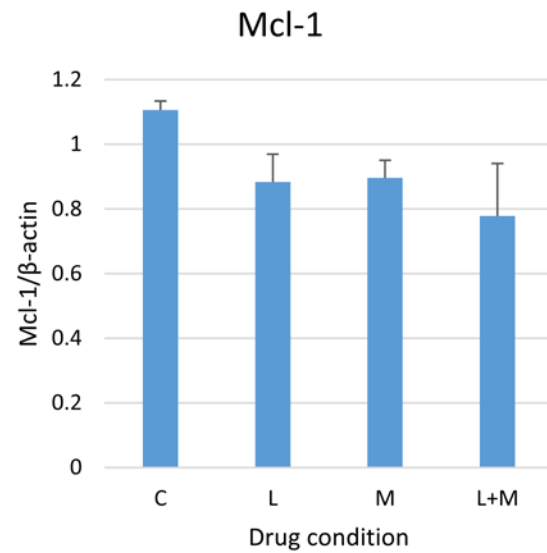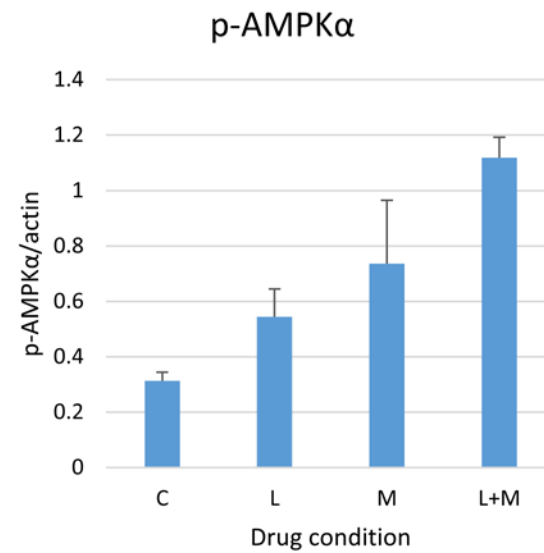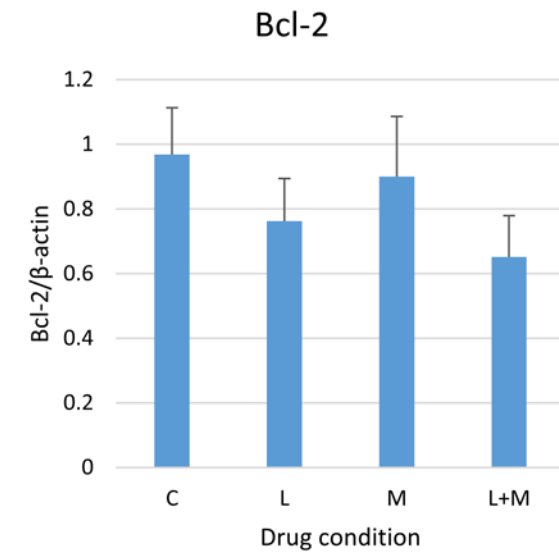

Table S1: Antibodies used in this study

| Antibody name         | 1st Ab Dilution | MW (kDa) | Company                                     | Host   | 2nd Ab Dilution |
|-----------------------|-----------------|----------|---------------------------------------------|--------|-----------------|
| CDK1                  | 1:200           | 34, 27   | 10762-1-AP, proteintech                     | Rabbit | 1:5000          |
| CDK4                  | 1:1000          | 34       | MA5-12984, ThermoFisher                     | Mouse  | 1:5000          |
| CDK2                  | 1:1000          | 34       | MA5-17052, ThermoFisher                     | Mouse  | 1:5000          |
| CyclinA2              | 1:500           | 56       | 18202-1-AP, proteintech                     | Rabbit | 1:5000          |
| CyclinB1              | 1:500           | 55-60    | 55004-1-AP, proteintech                     | Rabbit | 1:5000          |
| CyclinD1              | 1:200           | 36       | MA5-16356, ThermoFisher                     | Rabbit | 1:5000          |
| P21                   | 1:1000          | 21       | #2947, Cell signaling Technology, Inc., USA | Rabbit | 1:5000          |
| P27                   | 1:500           | 27       | 25614-1-AP, proteintech                     | Rabbit | 1:5000          |
| PI3K                  | 1:1000          | 85       | #4292, Cell signaling Technology, Inc., USA | Rabbit | 1:5000          |
| Total-AKT             | 1:1000          | 60       | #4691, Cell signaling Technology, Inc., USA | Rabbit | 1:5000          |
| pAKT(Ser473)          | 1:1000          | 60       | #4060, Cell signaling Technology, Inc., USA | Rabbit | 1:5000          |
| pAKT(Thr308)          | 1:1000          | 60       | #4056, Cell signaling Technology, Inc., USA | Rabbit | 1:5000          |
| GSK-3 $\beta$         | 1:1000          | 46       | #9315, Cell signaling Technology            | Rabbit | 1:5000          |
| pGSK-3 $\beta$ (Ser9) | 1:1000          | 46       | #9336, Cell signaling Technology            | Rabbit | 1:5000          |
| Bad                   | 1:1000          | 23       | #9239, Cell signaling Technology, Inc., USA | Rabbit | 1:5000          |
| p-Bad (Ser136)        | 1:1000          | 23       | #4366, Cell signaling Technology, Inc., USA | Rabbit | 1:5000          |
| Bcl-2                 | 1:1000          | 26       | #4223, Cell signaling Technology, Inc., USA | Rabbit | 1:5000          |
| Bax                   | 1:1000          | 20       | #5023, Cell signaling Technology            | Rabbit | 1:5000          |
| Mcl-1                 | 1:100           | 32, 40   | sc-819, SANTA CRUZ BIOTECHNOLOGY, INC.      | Rabbit | 1:5000          |
| $\beta$ -actin (ACTB) | 1:5000          | 43       | MAB1501, Millipore                          | Mouse  | 1:5000          |

\*MW: Molecular Weight
